# Supplementary material for: Quinacrine-Induced Autophagy in Ovarian Cancer Triggers Cathepsin-L Mediated Lysosomal/Mitochondrial Membrane Permeabilization and Cell Death
Source: MDPI journal article supplement (doi:10.3390/cancers13092004), 2021-04-21
Supplement: s1 [file s1]

Supplementary Materials

# Quinacrine-induced autophagy in ovarian cancer triggers Cathepsin-L mediated lysosomal/mitochondrial membrane permeabilization and cell death

Prabhu Thirusangu, Christopher L. Pathoulas, Upasana Ray, Yinan Xiao, Julie Staub, Ling Jin, Ashwani Khurana and Viji Shridhar\*

Table S1: Source of Materials Used

| Sl no | Name of the Chemical/Reagent/Plasmid/Antibody | Catalog Number/ RRID            | Source                        |
|-------|-----------------------------------------------|---------------------------------|-------------------------------|
| 1     | Quinacrine (QC) or quinacrine dihydrochloride | Q3251                           | Sigma-Aldrich                 |
| 2     | 3-methyladenine                               | M9281                           |                               |
| 3     | CA-074Me                                      | #18469                          |                               |
| 4     | Pepstatin A                                   | sc-45036                        |                               |
| 5     | Z-FY(tBU)-DMK                                 | sc-222423                       |                               |
| 6     | Anti-p62                                      | sc-28359/ RRID:AB_628279        | Cayman Chemical               |
|       |                                               | sc-32320/ sc-6498               |                               |
| 7     | anti-CTSL                                     | RRID:AB_626811/ RRID:AB_2245603 |                               |
| 8     | anti-CTSB                                     | sc-365558/ RRID:AB_10842446     |                               |
| 9     | anti-CTSD                                     | sc-374381/ RRID:AB_10991327     |                               |
| 10    | anti-Bcl-w                                    | sc-6418/ RRID:AB_2290499        | Santa Cruz Biotechnology Inc. |
| 11    | anti- anti-PCNA                               | sc-56/ RRID:AB_628110           |                               |
| 12    | anti-β actin                                  | sc-517582/ RRID:AB_2833259      |                               |
| 13    | anti- α tubulin                               | sc-5286/ RRID:AB_628411         |                               |
| 14    | Z-VAD-FMK                                     | #60332                          |                               |
| 15    | Bafilomycin                                   | #54645                          | Cell Signaling Technology     |
| 16    | Anti-LC3B                                     | #3868/RRID:AB_2137707           |                               |
| 17    | anti- PARP                                    | #9541S/ RRID:AB_331426          |                               |
| 18    | anti-cyt c                                    | #11940/ RRID:AB_2637071         |                               |
| 19    | anti- cleaved capsase-9                       | #9509/ RRID:AB_2073476          |                               |
| 20    | anti- cleaved caspase-3                       | #9664/ RRID:AB_2070042          | Sino Biological               |
| 21    | anti-mcl1                                     | #4572S/RRID:AB_2281980          |                               |
| 22    | and anti-Bim                                  | #2819/ RRID:AB_10692515         |                               |
| 23    | anti-bad                                      | #9292 / RRID:AB_331419          |                               |
| 24    | cell lysis buffer                             | #9803S.                         |                               |
| 25    | Anti-Bid                                      | #50351-T60                      | Millipore-Sigma               |
| 26    | anti-myc tag                                  | 05-419                          |                               |
| 27    | shCTSL -TRC1.5 plasmid                        | SHCLNG-NM_001912                |                               |
| 28    | pcDNA3.1-hCathepsin L construct               | #11250/ RRID:Addgene_11250      |                               |
| 29    | recombinant human CTSL (rCTSL) protein        | 952-CY                          |                               |
| 30    | recombinant human CTSB (rCTSB) protein        | 10483-H08H                      | Sino Biological               |
| 31    | MitoTracker® Red FM                           | M22425                          |                               |
| 32    | LysoTracker®                                  | L12492                          |                               |
|       |                                               |                                 |                               |
| 34    | Magic Red® Cathepsin L Assay                  | #942                            |                               |

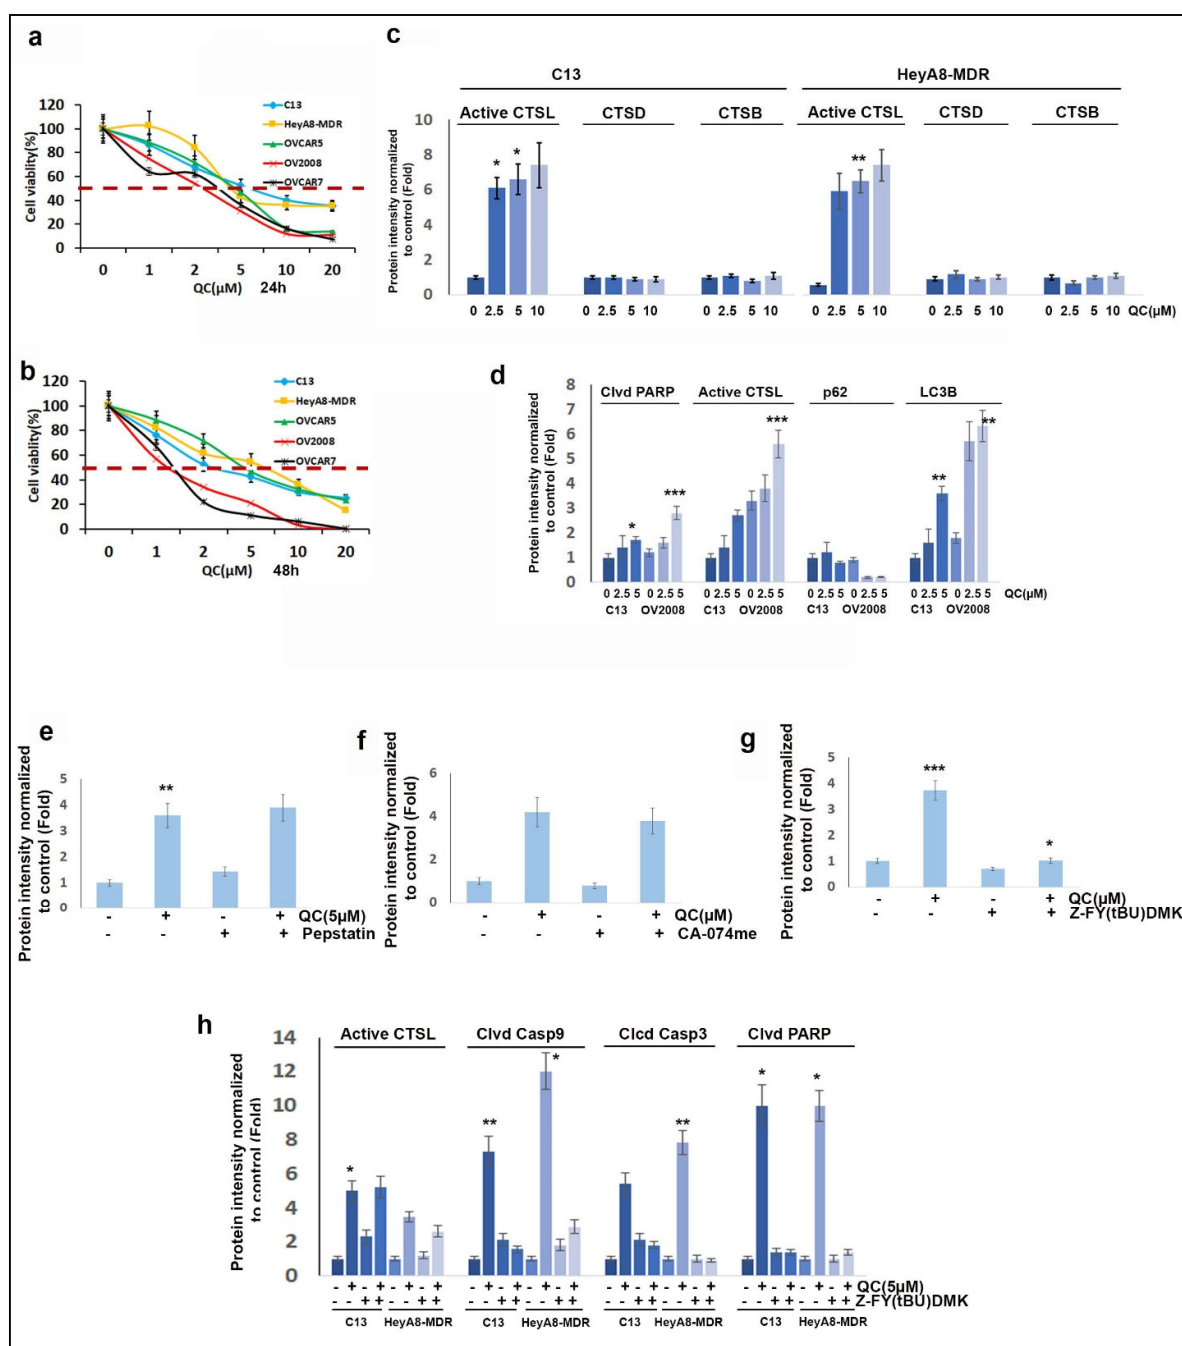

**Figure S1:** QC induces potential cytotoxicity against OC cells. **(a and b)** Cytotoxicity was determined by MTT assay on different OC cells at 24h and 48h respectively. **(c and d)** Graphs show the densitometric analysis for fig.1e and g respectively. **(e–h)** Densitometric plots for figures.2e,f,i and j respectively. (Statistical significance was analyzed by comparing test sample with untreated of same group and significance was expressed as \* $p < 0.05$  \*\* $p < 0.01$  \*\*\* $p < 0.001$ ). Abbreviations: QC- Quinacrine CTSL- Cathepsin L, CTSB- Cathepsin B, CTSD- Cathepsin D, LC3B- Light Chain 3B

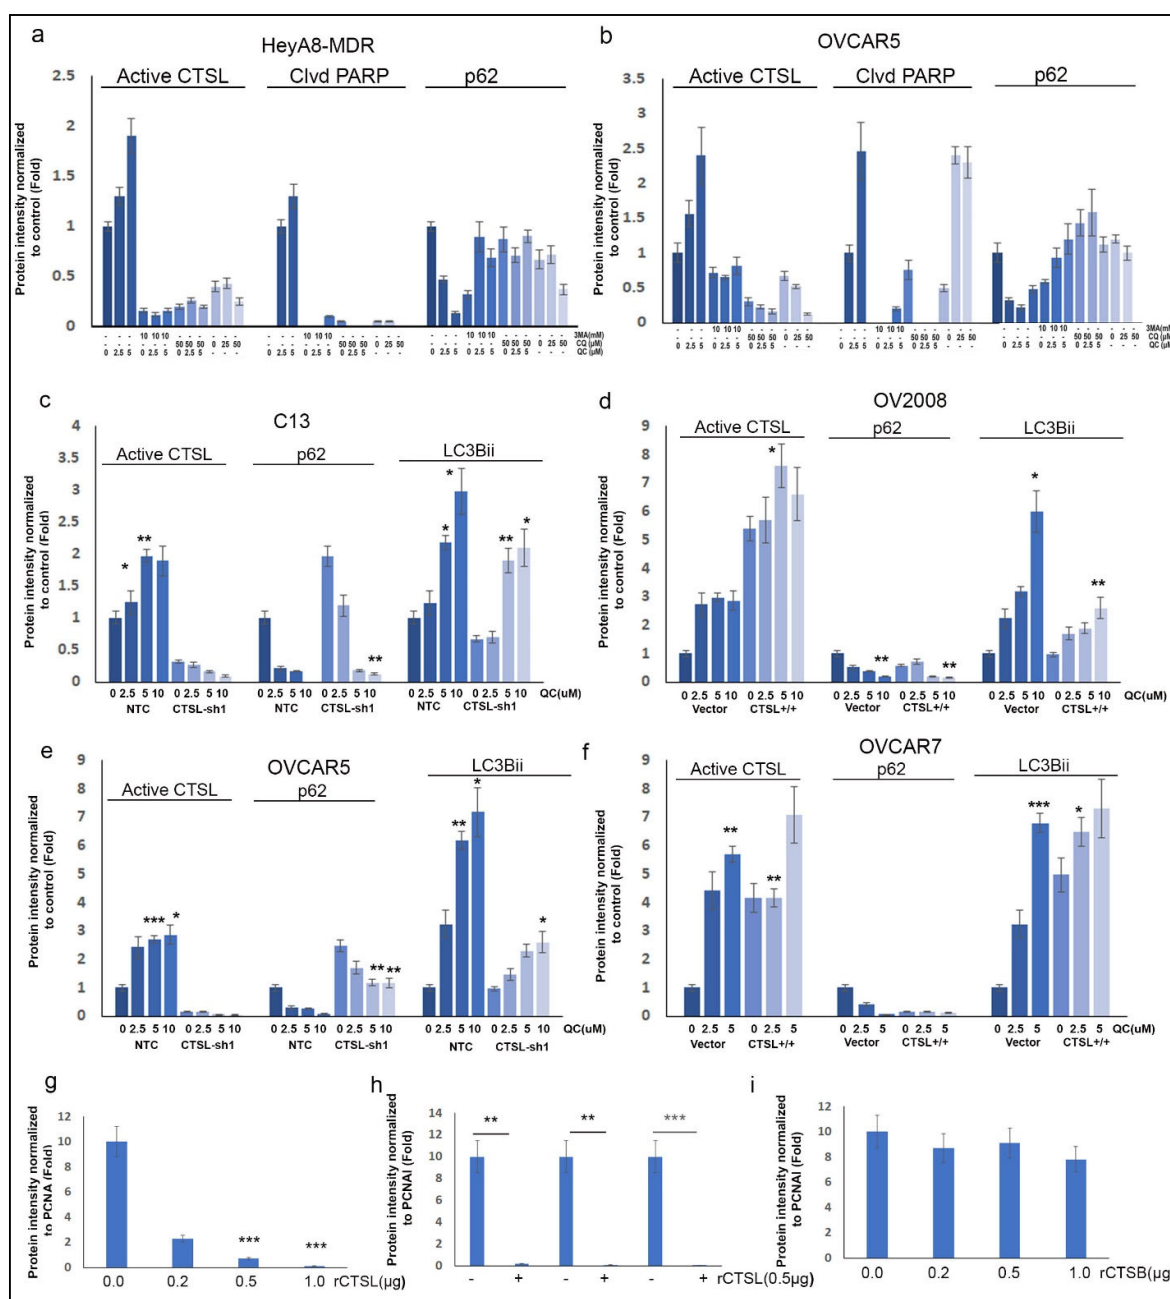

**Figure S2.** Densitometric analysis of protein expression normalized to control protein. **(a and b)** Densitometric graphs for figures 3c and d. **(c–f)** Graphs show normalized protein expression to control for figures 5a–d respectively. **(g–i)** Histograms show densitometric values for figures 5g–i. (Statistical significance was analyzed by comparing test sample with untreated of same group and significance was expressed as \* $p < 0.05$  \*\* $p < 0.01$  \*\*\* $p < 0.001$ ) QC-quinacrine, CTSL- cathepsin-L, p62- ubiquitinbinding protein 62, Cyt c- Cytochrome-c, ATG5- Autophagy Related 5, LC3B- Autophagy marker protein Light chain 3B,

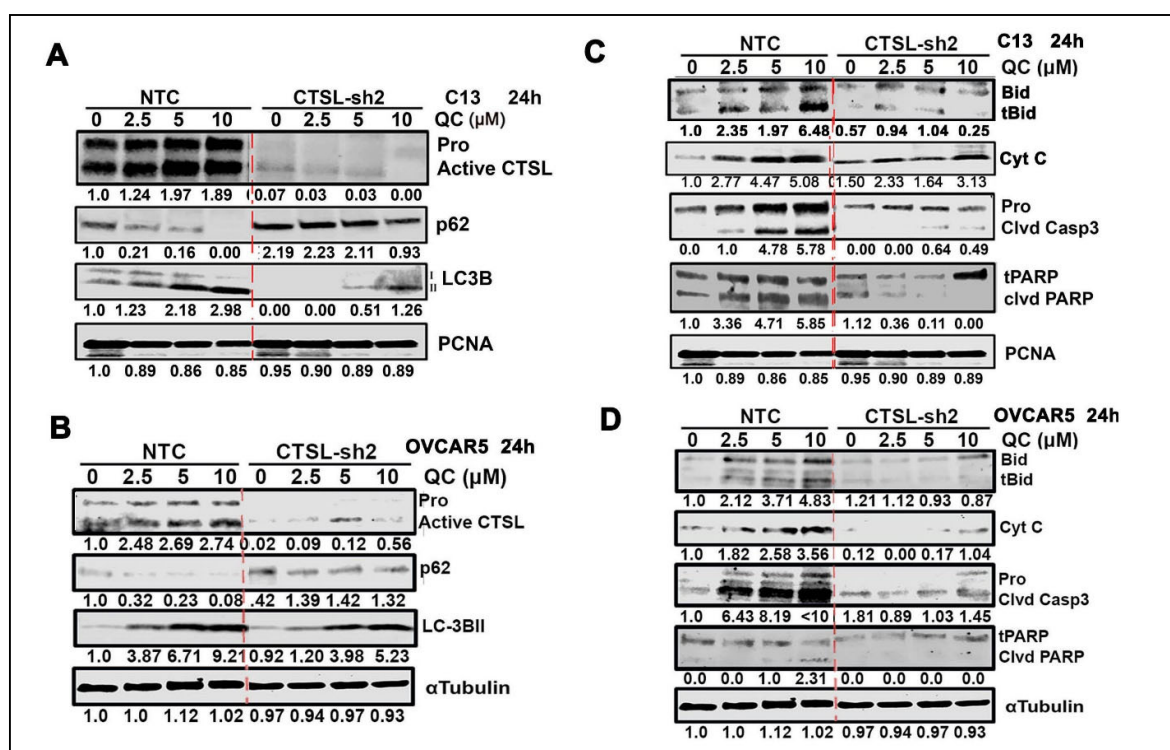

**Figure S3:** QC upregulated CTSL drives the autophagic flux by degrading p62 and cell death. (a and b) Western analysis in the NTC and CTSL KD sh2 clone of C13 and OVCAR5 cells upon treatment with 2.5, 5 and 10 μM QC for 24hrs against CTSL, LC3BII and p62 proteins. (c and d) Similar immunoblot analysis in the NTC and CTSL KD sh2 clone of C13 and OVCAR5 cells upon treatment with 2.5, 5 and 10 μM QC for 24hrs against tBid, Cyt-C, cleaved caspase3 and PARP proteins. Abbreviations: QC-quinacrine, CTSL- cathepsin-L, tBid- truncated Bcl-2 family member(Bid), p62- ubiquitinbinding protein 62, Cyt c- Cytochrome-c, ATG5- Autophagy Related 5, LC3B- Autophagy marker protein Light chain 3B, PARP- Poly (ADP-ribose) polymerase.

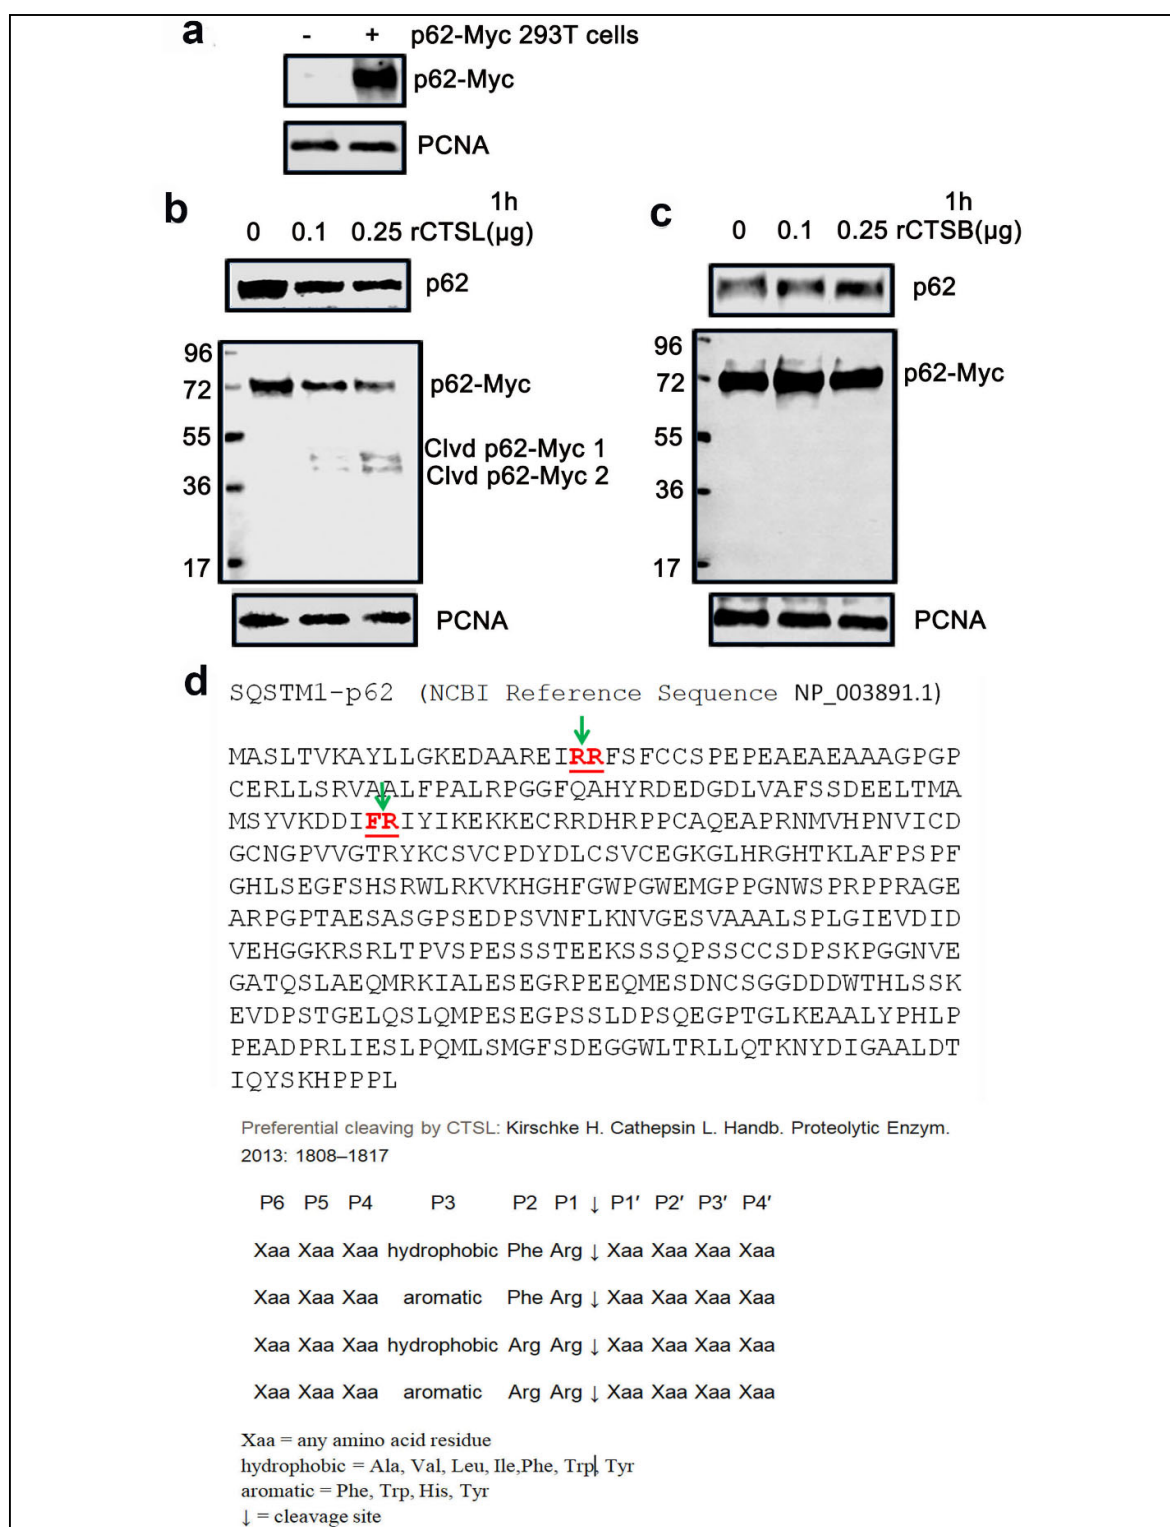

**Figure S4:** Recombinant CTSL cleaves autophagic key cargo protein p62 in Hek293T cells. (a) Myc tagged p62 protein was ectopically expressed in Hek293T cells. Western blot was performed by incubating ectopically expressed myc-p62 with rCTSL and/or rCTSB at 0.0, 0.1, 0.25 μg/sample for 1h and (b) rCTSL cleaves ectopically expressed myc tagged p62 at two sites whereas (c) rCTSB incubation exhibits intact myc-p62 protein. PCNA was used as a loading control in all the westerns. (d) Identification of site of possible peptide cleavage of p62(SQSTM1) by CTSL cleaving site demonstrated by Kirschke, 2013 [34].



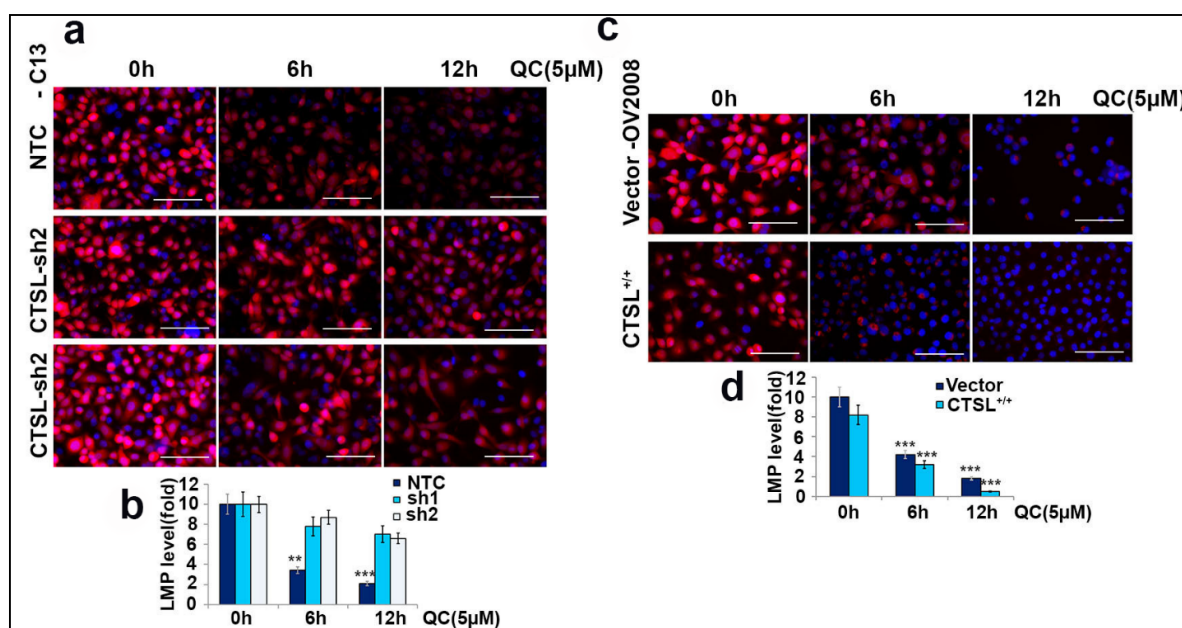

**Figure S5:** QC induces CTSL mediated LMP. Representative images of LMP induction in (a) CTSL KD sh1/sh2 and NTC control transfected C13 cells were exposed to 5µM QC for 6 and 12hrs and labelled with lysotracker Red and Hoechst33342 (blue) for nuclei.(b) quantitation of loss of red signal /indicative of LMP. (c) Similar study was executed in OV2008 control vector and CTSL-overexpressed cells and representative images provided. (d) Graphical representation was provided. (Scale bar – 200 µm and 40× magnifications and Statistical significance was analyzed by comparing test sample with untreated of same group and significance was expressed as \* $p < 0.05$  \*\* $p < 0.01$  \*\*\* $p < 0.001$ ).

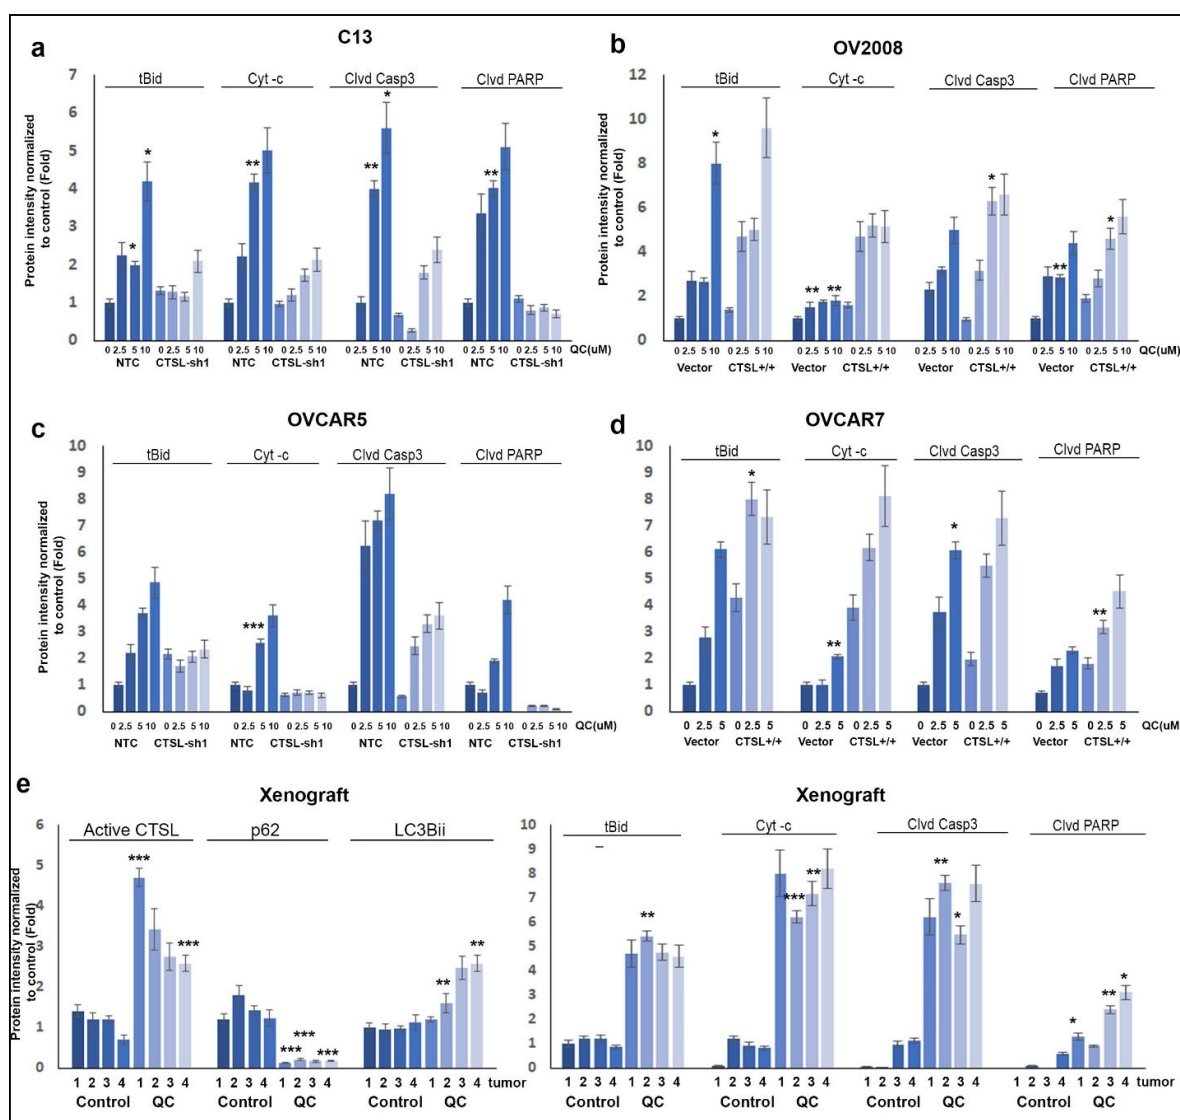

**Figure S6.** Densitometric analysis of protein expression normalized to control protein. **(a–d)** Densitometric graphs for figures 6g–j respectively. **(e)** Graphs show normalized protein expression to control for figure 7a of xenograft (Statistical significance was analyzed by comparing test sample with untreated of same group and significance was expressed as \* $p < 0.05$  \*\* $p < 0.01$  \*\*\* $p < 0.001$ ). Abbreviations: QC-quinacrine, CTSL- cathepsin-L, LMP-Lysosomal Membrane Permeabilization, MOMP-Mitochondrial Outer Membrane Permeabilization, tBid- truncated Bcl-2 family member(Bid), p62- ubiquitin-binding protein 62, Cyt c- Cytochrome-c, ATG5- Autophagy Related 5, LC3B- Autophagy marker protein Light chain 3B, PARP- Poly (ADP-ribose) polymerase.

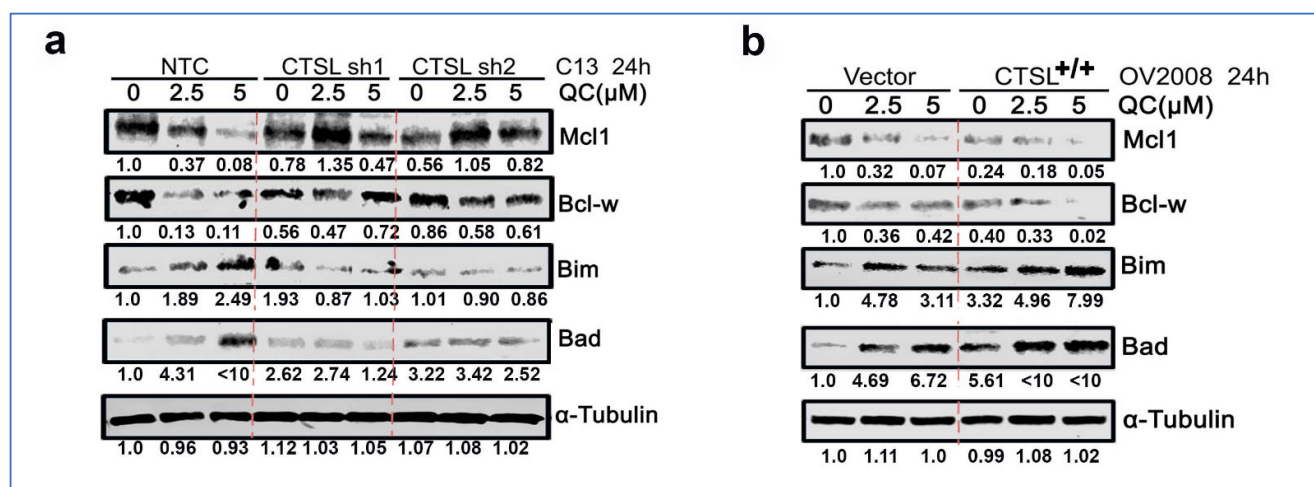

**Figure S7:** QC triggered CTSL disrupts pro and antiapoptotic homeostasis in ovarian cancer cells. Immunoblot analysis was performed in (a) CTSL KD sh1/sh2 and NTC control transfected C13 cells and (b) control vector and CTSL-overexpressed OV2008 in 24 hr QC treated cells using anti- Mcl1, Bcl-w, Bim and Bad.  $\alpha$ -tubulin was used as loading control.
